# Supplementary material
Source: Springer Nature journal article supplement (https://www.springermedizin.de/resource/supplementary/13012_2010_399_MOESM8_ESM.pdf/9629930)

No. of Articles

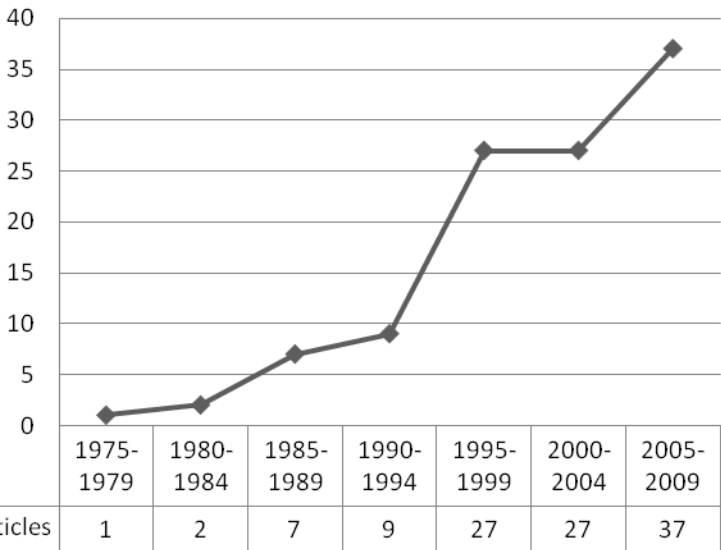

Supplement: MOESM8 [file 9629930]
